# Supplementary material for: Repeated Isolation of Extended-Spectrum-β-Lactamase-Positive Escherichia coli Sequence Types 648 and 131 from Community Wastewater Indicates that Sewage Systems Are Important Sources of Emerging Clones of Antibiotic-Resistant Bacteria
Source: PubMed Central journal article supplement (PMC6709473; doi:10.1128/aac.00823-19), 2019-08-23
Supplement: AAC.00823-19-s0001.pdf [file AAC.00823-19-s0001.pdf]

## Supplementary Files

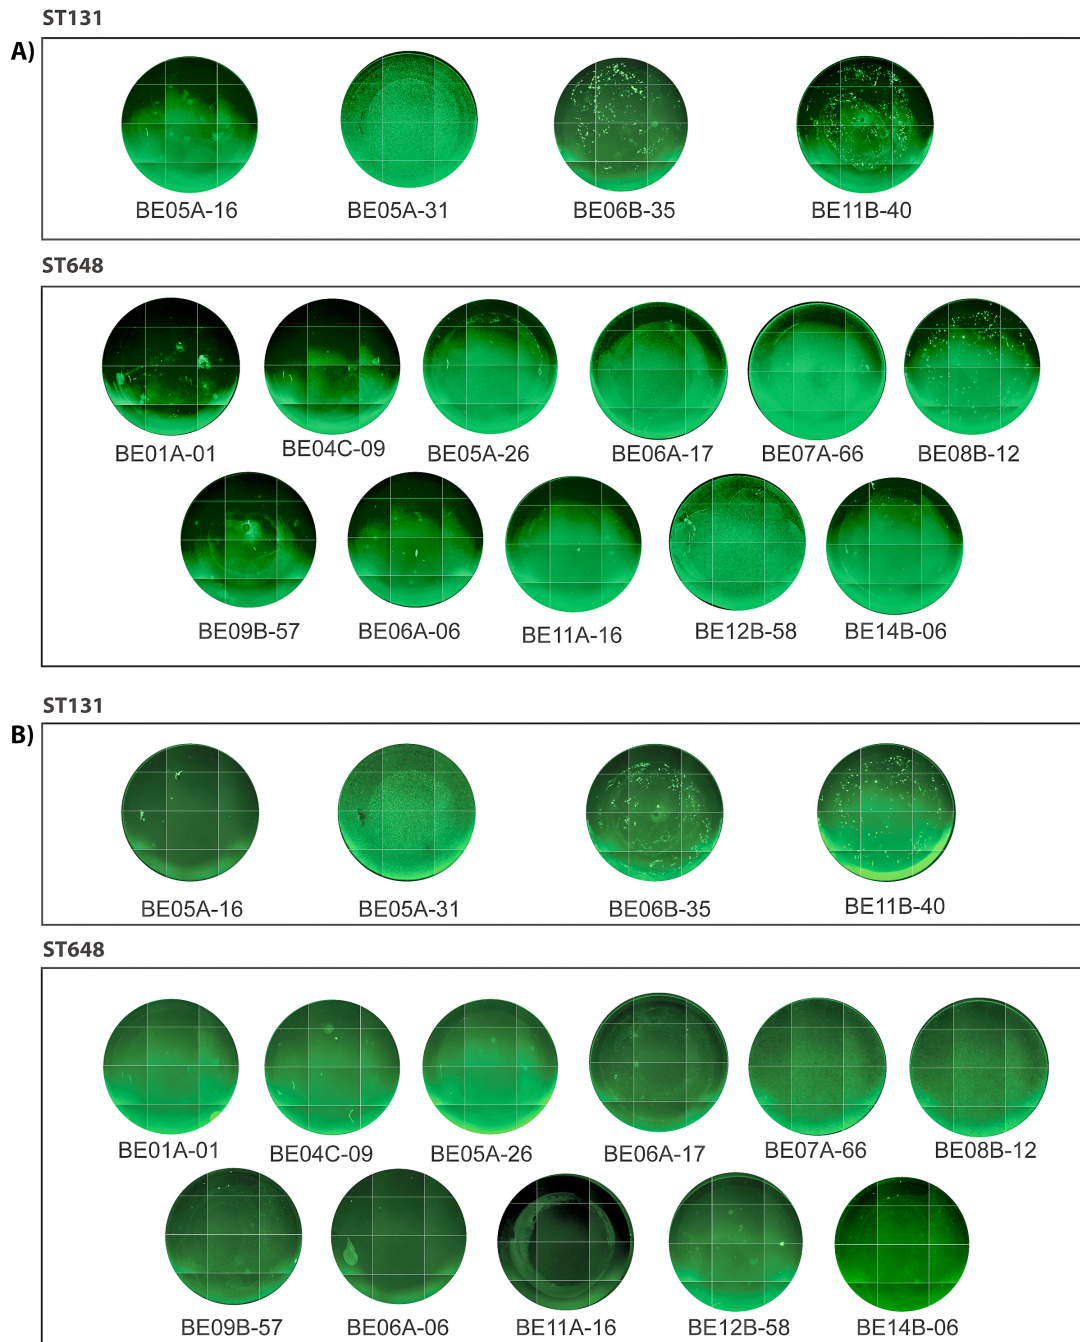

**Supplementary Figure 1. Analysis of exopolysaccharide matrix production of ST131 and ST648 isolates.** Bacterial isolates were grown in 96-well black polystyrene microplate with clear flat bottoms at 28°C (a) and 37°C (b). The isolates were fixed and stained with 25 g/ml FITC-conjugated concanavalin A (green) to assess EPS production. Images are representative of three independent experiments.

**Supplementary Table 1**

Metadata for a set of ST131 and ST648 isolates and reference isolates used for phylogenetic comparison.

| <b>Accession</b> | <b>Strain name</b> | <b>Collection date</b> | <b>Country</b> | <b>host status</b>                         | <b>isolation source</b> |
|------------------|--------------------|------------------------|----------------|--------------------------------------------|-------------------------|
| ERR161254        | ST-131-B36EC       | 2007                   | Australia      | disease:<br>pyelonephritis                 | blood                   |
| ERR161318        | ST-131-HVM1147     | 2010                   | Spain          | disease:<br>abdominal<br>abscess           | Peritoneal fluid        |
| ERR161319        | ST-131-HVM1181     | 2010                   | Spain          | disease:<br>bacteremia                     | blood                   |
| ERR161320        | ST-131-HVM1299     | 2010                   | Spain          | disease:<br>abdominal<br>abscess           | Abdominal<br>abscess    |
| ERR161321        | ST-131-HVM1619     | 2010                   | Spain          | disease:<br>surgical<br>wound<br>infection | Surgical wound          |
| ERR161322        | ST-131-HVM1997     | 2010                   | Spain          | disease:<br>pyelonephritis                 | urine                   |
| ERR161323        | ST-131-HVM2044     | 2010                   | Spain          | disease:<br>pyelonephritis                 | blood                   |
| ERR161324        | ST-131-HVM2049     | 2010                   | Spain          | disease:<br>cystitis                       | urine                   |
| ERR161325        | ST-131-HVM2289     | 2010                   | Spain          | disease:<br>cystitis                       | urine                   |
| ERR161327        | ST-131-HVM2757     | 2010                   | Spain          | disease:<br>cystitis                       | urine                   |
| ERR161315        | ST-131-HVM277      | 2010                   | Spain          | disease:<br>cystitis                       | urine                   |
| ERR161328        | ST-131-HVM3017     | 2010                   | Spain          | disease:<br>urinary tract<br>infection     | urine                   |
| ERR161329        | ST-131-HVM3189     | 2010                   | Spain          | disease:<br>cystitis                       | urine                   |
| ERR161306        | ST-131-HVM5        | 2010                   | Spain          | disease:<br>pyelonephritis                 | blood                   |
| ERR161308        | ST-131-HVM52       | 2010                   | Spain          | disease:<br>pyelonephritis                 | urine                   |
| ERR161316        | ST-131-HVM826      | 2010                   | Spain          | disease:<br>sepsis                         | blood                   |
| ERR161317        | ST-131-HVM834      | 2010                   | Spain          | disease:<br>urinary tract<br>infection     | urine                   |
| ERR161326        | ST-131-HVR2496     | 2010                   | Spain          | disease:<br>pyelonephritis                 | blood                   |
| ERR161311        | ST-131-HVR83       | 2010                   | Spain          | disease:<br>pyelonephritis                 | blood                   |
| ERR161252        | ST-131-MS2481      | 2007                   | Australia      | disease:<br>bacteremia                     | blood                   |
| ERR161253        | ST-131-MS2493      | 2007                   | Australia      | disease:<br>bacteremia                     | blood                   |

|           |               |      |                   |                                        |             |
|-----------|---------------|------|-------------------|----------------------------------------|-------------|
| ERR161312 | ST-131-P112EC | 2011 | Spain             | carriage                               | rectal swab |
| ERR161313 | ST-131-P146EC | 2011 | Spain             | carriage                               | rectal swab |
| ERR161314 | ST-131-P189EC | 2011 | Spain             | carriage                               | rectal swab |
| ERR161307 | ST-131-P50EC  | 2011 | Spain             | carriage                               | rectal swab |
| ERR161309 | ST-131-P53EC  | 2011 | Spain             | carriage                               | rectal swab |
| ERR161310 | ST-131-P56EC  | 2011 | Spain             | carriage                               | rectal swab |
| ERR161263 | ST-131-S100EC | 2009 | Australia         |                                        | rectal swab |
| ERR161264 | ST-131-S101EC | 2009 | Australia         |                                        | rectal swab |
| ERR161265 | ST-131-S102EC | 2010 | Australia         |                                        | urine       |
| ERR161266 | ST-131-S103EC | 2010 | Australia         | disease:<br>pyuria                     | urine       |
| ERR161267 | ST-131-S104EC | 2008 | Australia         | disease:<br>urinary tract<br>infection | urine       |
| ERR161268 | ST-131-S105EC | 2008 | Australia         | disease:<br>urinary tract<br>infection | urine       |
| ERR161270 | ST-131-S107EC | 2010 | Australia         | disease:<br>bacteremia                 | urine       |
| ERR161271 | ST-131-S108EC | 2009 | Australia         | disease:<br>febrile<br>neutropenia     | blood       |
| ERR161272 | ST-131-S109EC | 2009 | Australia         | carriage                               | urine       |
| ERR161237 | ST-131-S10EC  | 2009 | United<br>Kingdom | disease:<br>urinary tract<br>infection | urine       |
| ERR161273 | ST-131-S110EC | 2009 | Australia         | disease:<br>urinary tract<br>infection | urine       |
| ERR161274 | ST-131-S111EC | 2009 | Australia         | disease:<br>pyelonephritis             | urine       |
| ERR161275 | ST-131-S112EC | 2009 | Australia         | disease:<br>urinary tract<br>infection | urine       |
| ERR161276 | ST-131-S113EC | 2009 | Australia         |                                        | rectal swab |
| ERR161277 | ST-131-S114EC | 2011 | Australia         | disease:<br>urinary tract<br>infection | urine       |
| ERR161278 | ST-131-S115EC | 2011 | Australia         | disease:<br>urinary tract<br>infection | urine       |
| ERR161279 | ST-131-S116EC | 2011 | United<br>Kingdom | disease:<br>biliary sepsis             |             |
| ERR161280 | ST-131-S117EC | 2011 | United<br>Kingdom | disease:<br>biliary sepsis             |             |
| ERR161281 | ST-131-S118EC | 2011 | United<br>Kingdom | disease:<br>urinary tract<br>infection | urine       |
| ERR161282 | ST-131-S119EC | 2011 | United<br>Kingdom | disease:<br>bacteremia                 | blood       |
| ERR161238 | ST-131-S11EC  | 2009 | United<br>Kingdom | disease:<br>urinary tract<br>infection | urine       |
| ERR161283 | ST-131-S120EC | 2009 | Canada            | disease: acute<br>cholangitis          | blood       |

|           |               |      |                |                                        |                |
|-----------|---------------|------|----------------|----------------------------------------|----------------|
| ERR161284 | ST-131-S121EC | 2000 | Canada         | disease: lower urinary tract infection | urine          |
| ERR161285 | ST-131-S122EC | 2003 | Canada         | disease: lower urinary tract infection | urine          |
| ERR161286 | ST-131-S123EC | 2001 | Canada         | disease: lower urinary tract infection | urine          |
| ERR161287 | ST-131-S124EC | 2003 | Canada         | disease: lower urinary tract infection | urine          |
| ERR161288 | ST-131-S125EC | 2002 | Canada         | disease: surgical wound infection      | Surgical wound |
| ERR161289 | ST-131-S126EC | 2002 | Canada         | disease: lower urinary tract infection | urine          |
| ERR161290 | ST-131-S127EC | 2002 | Canada         | disease: lower urinary tract infection | urine          |
| ERR161291 | ST-131-S128EC | 2004 | Canada         | disease: sepsis                        | blood          |
| ERR161292 | ST-131-S129EC | 2004 | Canada         | disease: lower urinary tract infection | urine          |
| ERR161239 | ST-131-S12EC  | 2009 | United Kingdom | disease: urinary tract infection       | urine          |
| ERR161293 | ST-131-S130EC | 2004 | Canada         | disease: lower urinary tract infection | urine          |
| ERR161294 | ST-131-S131EC | 2002 | Canada         | disease: lower urinary tract infection | urine          |
| ERR161295 | ST-131-S132EC | 2005 | Canada         | disease: lower urinary tract infection | urine          |
| ERR161296 | ST-131-S133EC | 2005 | Canada         | disease: urosepsis                     | blood          |
| ERR161297 | ST-131-S134EC | 2005 | Canada         | disease: lower urinary tract infection | urine          |
| ERR161298 | ST-131-S135EC | 2005 | Canada         | disease: acute cholangitis             | blood          |
| ERR161240 | ST-131-S15EC  | 2009 | United Kingdom | disease: urinary tract infection       | urine          |
| ERR161241 | ST-131-S19EC  | 2009 | United Kingdom | disease: urinary tract infection       | urine          |
| ERR161234 | ST-131-S1EC   | 2007 | United Kingdom | disease: urinary tract infection       | urine          |
| ERR161242 | ST-131-S21EC  | 2009 | United         | disease:                               | urine          |

|           |              |      |                |                                  |       |
|-----------|--------------|------|----------------|----------------------------------|-------|
|           |              |      | Kingdom        | urinary tract infection          |       |
| ERR161243 | ST-131-S22EC | 2009 | United Kingdom | disease: urinary tract infection | urine |
| ERR161244 | ST-131-S24EC | 2009 | United Kingdom | disease: urinary tract infection | urine |
| ERR161245 | ST-131-S26EC | 2009 | United Kingdom | disease: urinary tract infection | urine |
| ERR161235 | ST-131-S2EC  | 2007 | United Kingdom | disease: urinary tract infection | urine |
| ERR161246 | ST-131-S30EC | 2007 | United Kingdom | disease: urinary tract infection | urine |
| ERR161300 | ST-131-S31EC | 2007 | United Kingdom | disease: urinary tract infection | urine |
| ERR161301 | ST-131-S32EC | 2007 | United Kingdom | disease: urinary tract infection | urine |
| ERR161247 | ST-131-S34EC | 2009 | United Kingdom | disease: urinary tract infection | urine |
| ERR161302 | ST-131-S37EC | 2009 | United Kingdom | disease: urinary tract infection | urine |
| ERR161248 | ST-131-S39EC | 2004 | United Kingdom |                                  |       |
| ERR161249 | ST-131-S43EC | 2004 | United Kingdom |                                  |       |
| ERR161250 | ST-131-S47EC | 2004 | United Kingdom |                                  |       |
| ERR161251 | ST-131-S53EC | 2004 | United Kingdom |                                  |       |
| ERR161236 | ST-131-S5EC  | 2007 | United Kingdom | disease: urinary tract infection | urine |
| ERR161303 | ST-131-S65EC | 2009 | Australia      |                                  | urine |
| ERR161299 | ST-131-S6EC  | 2007 | United Kingdom | disease: urinary tract infection | urine |
| ERR161304 | ST-131-S77EC | 2010 | Australia      | disease: urinary tract infection | urine |
| ERR161305 | ST-131-S79EC | 2009 | Australia      |                                  | urine |
| ERR161255 | ST-131-S92EC | 2009 | New Zealand    | disease: bacteremia              | blood |
| ERR161256 | ST-131-S93EC | 2009 | New Zealand    | disease: bacteremia              | blood |
| ERR161257 | ST-131-S94EC | 2009 | New Zealand    | disease: bacteremia              | blood |
| ERR161258 | ST-131-S95EC | 2009 | New Zealand    | disease: bacteremia              | blood |

|                  |                        |      |                       |                        |                              |
|------------------|------------------------|------|-----------------------|------------------------|------------------------------|
| ERR161259        | ST-131-S96EC           | 2010 | New Zealand           | disease:<br>bacteremia | blood                        |
| ERR161260        | ST-131-S97EC           | 2010 | New Zealand           | disease:<br>bacteremia | blood                        |
| ERR161261        | ST-131-S98EC           | 2008 | Australia             | carriage               | rectal swab                  |
| ERR161262        | ST-131-S99EC           | 2009 | Australia             | carriage               | rectal swab                  |
| SAMN<br>02471481 | 668                    |      | Utrecht               |                        | urine                        |
| SAMN<br>02138646 | BIDMC-19A              | 2010 | Boston,<br>USA        |                        | Broncho-<br>alveolar lavage  |
| SAMN<br>02138647 | BIDMC-19B              | 2010 | Boston,<br>USA        |                        | urine                        |
| SAMN<br>02138648 | BIDMC-19C              | 2010 | Boston,<br>USA        |                        | urine                        |
| SAMN<br>02138622 | BIDMC-2B               | 2010 | Boston,<br>USA        |                        | blood culture                |
| SAMN<br>02356581 | BIDMC-43a              | 2012 | Boston,<br>USA        |                        | blood culture                |
| SAMN0213862<br>6 | BIDMC-6                | 2010 | Boston,<br>USA        |                        | bile                         |
| SAMN<br>02581401 | BIDMC-82               | 2013 | Boston,<br>USA        |                        | urine                        |
| SAMN<br>02138640 | BIDMC-17A              | 2009 | Boston,<br>USA        |                        | blood culture                |
| SAMN0213864<br>1 | BIDMC-17B              | 2009 | Boston,<br>USA        |                        | Peritoneal fluid             |
| SAMN<br>02138623 | BIDMC-3                | 2009 | Boston,<br>USA        |                        | abdominal<br>incision        |
| SAMN<br>03217331 | CR694                  | 2014 | Nambour,<br>Australia | UTI                    | urine                        |
| SAMN<br>02709589 | ECONIH1                | 2013 | USA                   |                        | rectal swab                  |
|                  | HN80                   |      | Bolivia               |                        | Environmental<br>River water |
| SAME<br>A3138842 | IS5                    |      | Vienna,<br>Austria    |                        | unknown                      |
| SAMN<br>02470235 | LAU-EC8                | 2013 | Byblos,<br>Lebanon    |                        | gastrointestinal             |
| SAMN<br>02470239 | LAU-EC9                | 2013 | Byblos,<br>Lebanon    |                        | gastrointestinal             |
| SAMN<br>02639609 | LR09                   | 2006 | Arkansas,<br>USA      |                        | environmental                |
| SAMN<br>03145047 | NA023                  | 2009 | India                 |                        | prostitis                    |
|                  | E_coli_042             |      |                       |                        |                              |
|                  | E_coli_4608-58         |      |                       |                        |                              |
|                  | E_coli_55989           |      |                       |                        |                              |
|                  | E_coli_CFT073          |      |                       |                        |                              |
|                  | E_coli_E24377A         |      |                       |                        |                              |
|                  | E_coli_ETEC_H10<br>407 |      |                       |                        |                              |
|                  | E_coli_HS              |      |                       |                        |                              |
|                  | E_coli_IAI39           |      |                       |                        |                              |
|                  | E_coli_LF82            |      |                       |                        |                              |
|                  | E_coli_M4163           |      |                       |                        |                              |

|  |                               |  |  |  |  |
|--|-------------------------------|--|--|--|--|
|  | E_coli_Nissle_1917            |  |  |  |  |
|  | E_coli_O104-H4_str_2011C-3493 |  |  |  |  |
|  | E_coli_O127-H6_str_E2348-69   |  |  |  |  |
|  | E_coli_O157-H7_str_EDL933     |  |  |  |  |
|  | E_coli_O55-H7_str_RM12579     |  |  |  |  |
|  | E_coli_O7-K1_str_CE10         |  |  |  |  |
|  | E_coli_O83-H1_str_NRG_857C    |  |  |  |  |
|  | E_coli_S88                    |  |  |  |  |
|  | E_coli_SE11                   |  |  |  |  |
|  | E_coli_SMS-3-5                |  |  |  |  |
|  | E_coli_str_K-12_substr_MG1655 |  |  |  |  |
|  | E_coli_UMN026                 |  |  |  |  |
|  | E_coli_UTI89                  |  |  |  |  |
|  | S_boydii_Sb227                |  |  |  |  |
|  | S_dysenteriae_Sd197           |  |  |  |  |
|  | S_flexneri_2a_str_301         |  |  |  |  |
|  | S_sonnei_Ss046                |  |  |  |  |

## Supplementary Table 2

PlasmidFinder, ResFinder and VirulenceFinder results on the selected ST131 and ST648 isolates and reference isolates.

| sample name    | Resistance                                                                                                                                    | Virulence                 | plasmids schemed                                | plasmids unschemed                                         | pMLSTs                             |
|----------------|-----------------------------------------------------------------------------------------------------------------------------------------------|---------------------------|-------------------------------------------------|------------------------------------------------------------|------------------------------------|
| ST-648-NA023   | aac(6')Ib-cr,aadA5,blaCTX-M-15,blaOXA-1,catB3-like,dfrA17,mph(A),strA,strB,sul1,sul2,tet(A)                                                   | air,eilA,gad,lpfA         | IncFIA, IncFIB(AP001918), IncFII                | ColRNAI, Col(MG828)                                        | IncF [F31:A20:B1]                  |
| ST-648-LR09    | aac(3)-IId-like,aac(6')Ib-cr,aadA5,blaOXA-1,blaTEM-1B,catA1-like,catB3-like,dfrA17,mph(A),strA,strB,sul1,tet(B)                               | air,eilA,gad,lpfA         | IncFII(pRSB107), IncFIA, IncFIB(AP001918)       | IncY,ColRNAI, Col(MG828)                                   | IncF[F1:A1:B1]                     |
| ST-648-LAU-EC9 | aadA2,blaCTX-M-15,catA1-like,dfrA12,erm(B)-like,mph(A),sul1,tet(B)                                                                            | air,eilA,gad,ihA,lpfA,sat | IncFII(pRSB107), IncFIA, IncFIB(AP001918)       | Col(BS512), Col8282,Col156, Col(MG828)                     | IncF [F48:A1:B49]                  |
| ST-648-LAU-EC8 | aadA2,blaCTX-M-15,catA1-like,dfrA12,erm(B)-like,mph(A),sul1,tet(B)                                                                            | air,eilA,gad,ihA,lpfA,sat | IncFII(pRSB107), IncFIA, IncFIB(AP001918)       | Col(BS512), Col8282,Col156, Col(MG828)                     | IncF [F48:A1:B49]                  |
| ST-648-IS5     | aac(3)-IId-like,blaCTX-M-15,blaTEM-1B,catA1-like,strA,strB,sul2-like,tet(B)                                                                   | celb,eilA,gad,lpfA        | IncFII(pRSB107), IncFIA, IncFIB(AP001918)       | ColRNAI, Col(BS512), Col(MG828), Col156, p0111, IncB/O/K/Z | IncF[F1:A1:B1]                     |
| ST-648-HN80    | aadA5,blaTEM-1B,dfrA17,erm(B)-like,mph(A),strA-like,strB-like,sul1,tet(B)                                                                     | air,eilA,gad,lpfA         | IncFII(pRSB107), IncFIA, IncFIB(AP001918)       | Col(BS512), Col8282,Col156, ColpVC                         | IncF[F1:A1:B1]                     |
| ST-648-ECONIH1 | aac(6')Ib-like,aac(6')Ib-cr-like,aadA1,aadA5,blaCTX-M-15,blaKPC-2,blaOXA-9,blaTEM-1A,dfrA14-like,dfrA17,erm(B)like,mph(A),strA,strB,sul1,sul2 | air,eilA,gad,lpfA         | IncFII(pRSB107), IncFIA, IncFIB(AP001918), IncN |                                                            | IncN[ST-6], IncF [F1:A1:B1]        |
| ST-648-CR694   | aac(6')Ib-cr-like,aadA5,blaCMY-42,blaNDM-5,dfrA17,erm(B)like,mph(A),sul1                                                                      | air,eilA,gad,iss,lpfA     | IncFII,IncI1,IncFIB(pB171)                      | ColRNAI, Col(MG828),IncX3,ColE10,IncX4,Col8282             | IncI1[Unknown ST], IncF[F36:A-B32] |



|                  |                                                                                                        |                           |                       |                                  |                          |
|------------------|--------------------------------------------------------------------------------------------------------|---------------------------|-----------------------|----------------------------------|--------------------------|
|                  | ,tet(B)                                                                                                |                           |                       |                                  |                          |
| ST-648-BIDMC-82  | aac(6')-IIC, blaCTX-M-14, blaKPC-2, blaSHV-12, blaTEM-1B, dfrA14-like, ere(A)-like, mph(A), sul1, sul2 | air, eilA, gad, iss, lpfA | IncHI2A, IncHI2, IncN | TrfA, ColRNAI, IncX4, IncB/O/K/Z | IncN[ST-6], IncHI2[ST-1] |
| ST-648-BIDMC-6   | aac(6')-IIC, blaKPC-2, blaSHV-12, blaTEM-1B, dfrA14-like, ere(A)-like, mph(A), sul1, sul2              | air, eilA, gad, iss, lpfA | IncHI2A, IncHI2, IncN | TrfA, ColRNAI, IncX4, Col(MG828) | IncN[ST-6], IncHI2[ST-1] |
| ST-648-BIDMC-43a | aac(6')-IIC, blaKPC-2, blaSHV-12, ere(A)-like, sul1, sul2                                              | air, eilA, gad, iss, lpfA | IncHI2A, IncHI2       | TrfA, Col(MG828), IncX4, ColRNAI | IncHI2[ST-1]             |
| ST-648-BIDMC-3   | aac(6')-IIC, blaKPC-2, blaSHV-12, blaTEM-1B, dfrA14-like, ere(A)-like, mph(A), sul1, sul2              | air, eilA, gad, iss, lpfA | IncHI2A, IncHI2, IncN | TrfA, ColRNAI, IncX4, Col(MG828) | IncHI2[ST-1], IncN[ST-6] |
| ST-648-BIDMC-2B  | aac(6')-IIC, blaKPC-2, blaSHV-12, blaTEM-1B, dfrA14-like, ere(A)-like, mph(A), sul1, sul2              | air, eilA, gad, iss, lpfA | IncHI2A, IncHI2, IncN | TrfA, ColRNAI, IncX4, Col(MG828) | IncHI2[ST-1], IncN[ST-6] |
| ST-648-BIDMC-19C | aac(6')-IIC, blaKPC-2, blaSHV-12, blaTEM-1B, dfrA14-like, ere(A)-like, mph(A), sul1, sul2              | air, eilA, gad, iss, lpfA | IncHI2A, IncHI2, IncN | TrfA, IncX4, Col(MG828)          | IncN[ST-6], IncHI2[ST-1] |
| ST-648-BIDMC-19B | aac(6')-IIC, blaKPC-2, blaSHV-12, dfrA14-like, ere(A)-like, sul1, sul2                                 | air, eilA, gad, iss, lpfA | IncHI2A, IncHI2, IncN | TrfA, IncX4, Col(MG828)          | IncHI2[ST-1], IncN[ST-6] |
| ST-648-BIDMC-19A | aac(6')-IIC, blaKPC-2, blaSHV-12, blaTEM-1B, dfrA14-like, ere(A)-like, mph(A), sul1, sul2              | air, eilA, gad, iss, lpfA | IncHI2A, IncHI2, IncN | TrfA, IncX4, Col(MG828)          | IncN[ST-6], IncHI2[ST-1] |
| ST-648-BIDMC-17B | aac(6')-IIC, blaKPC-                                                                                   | air, eilA, gad, iss, lpfA | IncHI2A, IncHI2, IncN | TrfA, ColRNAI, IncX4,            | IncN[ST-6], IncHI2[ST-1] |

|                  |                                                                                                                                         |                                |                                         |                                              |                                   |
|------------------|-----------------------------------------------------------------------------------------------------------------------------------------|--------------------------------|-----------------------------------------|----------------------------------------------|-----------------------------------|
|                  | 2,blaSHV-12,blaTEM-1B,dfrA14-like,ere(A)-like,mph(A),sul1,sul2                                                                          |                                |                                         | Col(MG828)                                   |                                   |
| ST-648-BIDMC-17A | aac(6')-IIc,blaKPC-2,blaLEN12-like,blaSHV-12,blaSHV-12-like,blaTEM-1B,dfrA14-like,ere(A)-like,mph(A),sul1,sul2                          | air,eilA,gad,iss,lpfA          | IncHI2A,IncHI2,IncN                     | TrfA,ColRNAI,IncX4,Col(MG828)                | IncN[ST-6],IncHI2[ST-1]           |
| ST-648-668       | aac(3)-IIa-like,aac(6')Ib-cr,blaCMY-2-like,blaCTX-M-15,blaOXA-1,blaTEM-1B,catB3-like,dfrA25,QnrB2,sul1,tet(A)                           | air,eilA,lpfA                  | IncN                                    | Col8282,Col(MG828),ColRNAI,Col156,IncB/O/K/Z | IncN[ST-5]                        |
| ST-131-S99EC     | aadA5,dfrA17,mph(A),sul1,tet(A)                                                                                                         | gad,iha,iss,sat                | IncFII,IncFIA                           | Col8282                                      | IncF[F2:A1:B-]                    |
| ST-131-S98EC     | aac(3)-IId-like,aac(6')Ib-cr-like,aacA4-like,aadA5,blaOXA-1,blaTEM-1B,catA1-like,catB3-like,dfrA17-like,strA,strB,sul1-like,sul2,tet(B) | gad,iha,iss,sat                | IncFII(pRSB107),IncFIA,IncFIB(AP001918) | Col(MG828),IncQ1,Col156,ColRNAI              | IncF[F48:A1:B49]                  |
| ST-131-S97EC     | aac(3)-IIa-like,aac(6')Ib-cr,aadA5,blaCTX-M-15,blaOXA-1,catB3-like,dfrA17,mph(A),strA,strB-like,sul1,sul2,tet(A)-like                   | gad,iha,ireA,iss,sat,senB      | IncFII(pRSB107),IncFIA,IncFIB(AP001918) | IncY,Col(MG828),Col156,ColRNAI               | IncF[F1:A1:B16]                   |
| ST-131-S96EC     | aac(3)-IId-like,blaTEM-1B                                                                                                               | gad,iha,iss,sat,senB           | IncFII(pRSB107),IncFIA,IncFIB(AP001918) | Col8282,Col156                               | IncF[F1:A2:B20]                   |
| ST-131-S95EC     |                                                                                                                                         | gad,iha,nfaE,senB              | IncFII(29),IncI1,IncFIB(AP001918)       | Col156                                       | IncI1[Unknown ST],IncF[F29:A-B10] |
| ST-131-S94EC     | blaTEM-1B,tet(A)                                                                                                                        | gad,iha,iss,sat                | IncFIA,IncFII                           |                                              | IncF[F2:A1:B-]                    |
| ST-131-S93EC     | aadA5,blaTEM-1B,dfrA17,mph(A),sul1                                                                                                      | gad,iha,iss,sat,senB           | IncFII(pRSB107),IncFIA,IncFIB(AP001918) | Col156,IncX4,Col(MG828)                      | IncF[F1:A2:B20]                   |
| ST-131-S92EC     | blaCMY-2                                                                                                                                | astA,gad,iha,iroN,iss,mchF,tsh | IncFII(pRSB107),IncI1,IncFIB(AP001918)  | IncX1,ColRNAI,Col(MG828)                     | IncI1[ST-12],IncF[F4:A-B1]        |

|              |                                                                                                                                                                       |                                         |                                                      |                                                |                                 |
|--------------|-----------------------------------------------------------------------------------------------------------------------------------------------------------------------|-----------------------------------------|------------------------------------------------------|------------------------------------------------|---------------------------------|
|              |                                                                                                                                                                       |                                         | 01918)                                               |                                                |                                 |
| ST-131-S79EC | aadA5,blaCTX-M-15,dfrA17,mph(A),sul1,tet(A)-like                                                                                                                      | cnf1,gad,iha,iss,sat                    | IncFII,IncFIA                                        | IncY                                           | IncF[F2:A1:B-]                  |
| ST-131-S77EC | blaTEM-1B,dfrA14-like,strA-like,strB,sul2,tet(A),tet(B)                                                                                                               | gad,iha,iss,nfaE,sat,senB               | IncFII,IncFIB(AP001918),IncN                         | Col156,Col(MG828)                              | IncF[F51:A-B10],IncN[ST-3]      |
| ST-131-S6EC  | blaCTX-M-15,mph(A)                                                                                                                                                    | cnf1,gad,iha,iss,sat                    | IncFII(pRSB107),IncFIB(pB171)                        |                                                | IncF[F1:A-B23]                  |
| ST-131-S65EC | aadA5,blaTEM-1B,dfrA17,mph(A),strA,strB-like,sul1,sul2,tet(A)                                                                                                         | gad,iha,nfaE,sat,senB                   | IncFII(29),IncFIB(AP001918)                          | Col156                                         | IncF[F29:A-B10]                 |
| ST-131-S5EC  | aadA5,blaCMY-23,blaTEM-1B,dfrA17,mph(A),sul1,tet(A)                                                                                                                   | gad,iha,iss,nfaE,sat                    | IncFII,IncFIA                                        | Col8282,Col(MG828)                             | IncF[F2:A1:B-]                  |
| ST-131-S53EC | aac(6')Ib-cr,aadA5,blaCMY-23,blaCTX-M-15,blaOXA-1,blaTEM-1B,catB3-like,dfrA17,mph(A),sul1,tet(A)                                                                      | gad,iha,iss,nfaE,sat                    | IncFII,IncFIA                                        | Col8282,Col(MG828)                             | IncF[F2:A1:B-]                  |
| ST-131-S47EC | aac(3)-IIa-like,aac(6')Ib-cr,aadA1-like,aadA5,blaCMY-23,blaCTX-M-15,blaOXA-1,blaOXA-9,blaTEM-1A,catB3-like,dfrA17,mph(A),strA,strB-like,sul1,sul2,tet(A)              | cma,gad,iha,ireA,iroN,iss,nfaE,sat,senB | IncFIA,IncFIB(AP001918),IncFII                       | ColRNAI,Col(MG828),Col156,IncX4,Col8282,ColpVC | IncF[F88*:A1:B16]               |
| ST-131-S43EC | aac(6')Ib-cr-like,aacA4-like,aadA1,aadA5,blaCMY-23,blaCTX-M-15,blaOXA-1,blaOXA-9,blaTEM-1C,catB3-like,dfrA17,dfrA5,ere(A),mph(A),strA,strB-like,sul1,sul2,tet(A)-like | gad,iss,nfaE                            | IncFII,IncN,IncFII(K),IncFIA                         | IncX4,IncB/O/K/Z,ColpVC,Col(MG828)             | IncN[Unknown ST],IncF[F2:A1:B-] |
| ST-131-S39EC | blaTEM-1B,catA1-like,dfrA7,strA-like,strB-like,sul1,sul2,tet(B)                                                                                                       | gad,nfaE                                | IncFII(pRSB107),IncFIA,IncFIB(AP001918),IncFII(pCoo) |                                                | IncF[F1:A1:B1]                  |

|               |                                                                                           |                           |                                                        |                                 |                  |
|---------------|-------------------------------------------------------------------------------------------|---------------------------|--------------------------------------------------------|---------------------------------|------------------|
| ST-131-S37EC  | aph(3')-la,blaTEM-1B,catA1-like,dfrA14-like,mph(A),strA, strB,sul2,tet(B)                 | gad,iha,nfaE,sat          | IncFII(pRSB107), IncFIA,IncFIB(AP001918),IncFIB(pLF82) | IncQ1                           | IncF[F1:A1:B1]   |
| ST-131-S34EC  |                                                                                           | gad,iha,iss,sat,senB      | IncFII,IncFIB(AP001918)                                | Col156                          | IncF[F51:A-B10]  |
| ST-131-S32EC  | aph(3')-la,blaTEM-1B,tet(B)                                                               | gad,iha,senB              | IncFII(pRSB107), IncFIA,IncFIB(pB171)                  | Col156                          | IncF[F1:A1:B23]  |
| ST-131-S31EC  | aadA5,blaCMY-23,blaTEM-1B,dfrA17,mph(A),strA,strB-like,sul1,sul2,tet(A)                   | gad,iha,iss,nfaE,sat      | IncFIA,IncFII                                          |                                 | IncF[F2:A1:B-]   |
| ST-131-S30EC  | tet(B)                                                                                    | cnf1,gad,senB             | IncFII(pRSB107), IncFIA,IncFIB(pB171)                  | Col156                          | IncF[F1:A1:B23]  |
| ST-131-S2EC   | aadA1,blaTEM-1B,dfrA1,sul1,tet(B)                                                         | gad,senB                  | IncFII(pRSB107), IncFIA,IncFIB(pB171)                  | Col156                          | IncF[F1:A1:B23]  |
| ST-131-S26EC  |                                                                                           | gad,iha,iss,nfaE,sat,senB | IncFII(29),IncFIB(AP001918)                            | Col156                          | IncF[F29:A-B10]  |
| ST-131-S24EC  |                                                                                           | gad,iha,iss,nfaE,sat,senB | IncFII(29),IncFIB(AP001918)                            | Col156                          | IncF[F29:A-B10]  |
| ST-131-S22EC  | aadA2,blaTEM-1B-like,catA1-like,dfrA12,mph(A),sul1                                        | gad,iha,iss,nfaE,sat      | IncFII(29),IncFIB(AP001918)                            | Col(MG828)                      | IncF[F77:A-B10]  |
| ST-131-S21EC  | aac(3)-IIa-like,aadA5,blaCTX-M-15,catB3-like,dfrA17,mph(A)-like,sul1                      | gad,iha,iss,sat           | IncFIA                                                 | ColpVC, Col(MG828)              | IncF[F-A1:B-]    |
| ST-131-S1EC   | aadA1,blaTEM-1A,dfrA1,sul2,tet(B)                                                         | gad,iha,iss,sat,senB      | IncFII(pRSB107), IncFIB(AP001918)                      | IncX1,Col156, IncX4, IncB/O/K/Z | IncF[F4:A-B10]   |
| ST-131-S19EC  | aac(6')Ib-cr,blaCTX-M-15,blaOXA-1,blaTEM-1B,catB3-like,dfrA1,strA, strB,sul2,tet(A)       | gad,iha,iss,sat           | IncFIA,IncFII                                          | IncX1, Col(MG828)               | IncF[F2:A1:B-]   |
| ST-131-S15EC  | aac(3)-IId-like,aadA5,blaCTX-M-14,blaTEM-1B,dfrA17,mph(A),strA,strB-like,sul1,sul2,tet(A) | gad,iha,iss,sat,senB      | IncFII(pRSB107), IncFIA, IncFIB(AP001918)              | Col156, Col(MG828)              | IncF[F1:A2:B20]  |
| ST-131-S135EC | aac(6')Ib-cr,aadA5,blaCTX-M-15,blaOXA-1,catB3-like,dfrA17,mph(A),sul1,tet(A)              | gad,iha,iss,nfaE,sat      | IncFII,IncFIA                                          | p0111                           | IncF[F2:A1:B-]   |
| ST-131-S134EC | aac(3)-IId-like,aac(6')Ib-                                                                | gad,iha,ireA,iss,nfaE,sat | IncFII(pRSB107), IncFIA,IncFIB(AP                      | Col(BS512),ColR NAI,IncQ1,Col(  | IncF[F48:A1:B49] |

|               |                                                                                                                                        |                               |                                         |                                        |                              |
|---------------|----------------------------------------------------------------------------------------------------------------------------------------|-------------------------------|-----------------------------------------|----------------------------------------|------------------------------|
|               | cr,aadA5,blaCTX-M-15,blaOXA-1,blaTEM-1B,catA1-like,catB3-like,dfrA17,mph(A),strA,strB,sul1,sul2,tet(B)-like                            |                               | 001918)                                 | MG828)                                 |                              |
| ST-131-S133EC | blaCTX-M-15,tet(A)                                                                                                                     | gad,iha,iss,sat               | IncFII,IncFIA                           | Col8282,Col(MG828)                     | IncF[F2:A1:B-]               |
| ST-131-S132EC | aac(3)-IIa-like,aac(6')Ib-cr,aadA1,blaCTX-M-15,blaOXA-1,catB3-like,dfrA15,sul1,tet(A)                                                  | cma,gad,iha,iroN,iss,sat      | IncFIB(AP001918),IncFII(pCoo)           | IncX4,Col(MG828)                       | IncF[F16:A::B1]              |
| ST-131-S131EC | aac(6')Ib-cr,aadA2,aph(3')-Ia,blaCTX-M-15,blaOXA-1,blaTEM-1B,catB3-like,dfrA12,mph(A),sul1,tet(A)                                      | gad,iha,iss,sat               | IncFII,IncFIB(AP001918),IncFIA          |                                        | IncF[F22:A1:B20]             |
| ST-131-S130EC | aac(6')Ib-cr,aadA5,blaCTX-M-15,blaOXA-1,catB3-like,dfrA17,mph(A),sul1,tet(A)                                                           | gad,iha,iss,nfaE,sat          | IncFII,IncFIA                           | Col(MG828)                             | IncF[F2:A1:B-]               |
| ST-131-S12EC  | aac(3)-IIId-like,aac(6')Ib-cr,aadA5,blaCTX-M-15,blaOXA-1,blaTEM-1B,catA1-like,catB3-like,dfrA17,mph(A),strA,strB,sul1,sul2,tet(B)-like | gad,iha,ireA,iss,nfaE,sat     | IncFII(pRSB107),IncFIA,IncFIB(AP001918) | Col(BS512),IncY,IncQ1,IncX4,Col(MG828) | IncF[F48:A1:B49]             |
| ST-131-S129EC | aadA1,blaSHV-2-like,dfrA1,sul1,tet(A)                                                                                                  | gad,iroN,mchF                 | IncFII,IncI1,IncFIB(AP001918)           | ColRNAI,Col(MG828)                     | IncI1[ST-26],IncF[F24:A:B40] |
| ST-131-S128EC | aac(6')Ib-cr,aadA5,blaCTX-M-15,blaOXA-1,catB3-like,dfrA17,mph(A),sul1,tet(A)                                                           | gad,iha,iss,sat               | IncFII,IncFIA                           | Col(BS512),Col156,IncX4                | IncF[F2:A1:B-]               |
| ST-131-S127EC | blaCTX-M-15                                                                                                                            | gad,iha,iss,sat               | IncFII,IncFIA                           | Col8282,Col(MG828)                     | IncF[F2:A1:B-]               |
| ST-131-S126EC | blaCTX-M-15,blaTEM-1B,dfrA14-like,strA,strB,sul2                                                                                       | cma,gad,iha,iroN,iss,mchF,sat | IncFIA,IncFIB(AP001918),IncFII          | IncY,IncX4                             | IncF[F100:A6*:B1]            |
| ST-131-S125EC | aac(3)-IIId-like,aac(6')Ib-                                                                                                            | gad,ireA,iss,nfaE             | IncFII(pRSB107),IncFIA,IncFIB(AP        | Col(BS512),IncY,IncQ1,IncX4,Col        | IncF[F48:A1:B49]             |

|               |                                                                                                        |                       |                                          |                                               |                   |
|---------------|--------------------------------------------------------------------------------------------------------|-----------------------|------------------------------------------|-----------------------------------------------|-------------------|
|               | cr,blaCTX-M-15,blaOXA-1,blaTEM-1B,catA1-like,catB3-like,strA,strB,sul2,tet(B)-like                     |                       | 001918)                                  | (MG828)                                       |                   |
| ST-131-S124EC | aac(3)-IIa-like,aac(6')Ib-cr,blaCTX-M-15,blaOXA-1,blaTEM-1B,catB3-like,tet(A)-like                     | gad,iha,iss,sat       | IncFIA,IncFII                            | Col(MG828)                                    | IncF[F2:A1:B-]    |
| ST-131-S123EC | aac(3)-IIa-like,aac(6')Ib-cr,aadA5,blaCTX-M-15,blaOXA-1,blaTEM-1B,catB3-like,dfrA17,mph(A),sul1,tet(A) | gad,iha,iss,sat       | IncFIA,IncFIB(AP001918),IncFII           | Col8282                                       | IncF[F22:A1:B20]  |
| ST-131-S122EC | aac(3)-IIa-like,aac(6')Ib-cr,blaCTX-M-15,blaOXA-1,blaTEM-1B,catB3-like,tet(A)                          | gad,iha,iss,sat       | IncFIA,IncFII                            | Col(MG828)                                    | IncF[F2:A1:B-]    |
| ST-131-S121EC | aac(3)-IIId-like,aadA5,blaCTX-M-14,blaTEM-1B,dfrA17,mph(A),strA,strB-like,sul1,sul2,tet(A)             | gad,iha,nfaE,sat,senB | IncFII(pRSB107),IncFIA,IncFIB(AP001918)  | Col156                                        | IncF[F1:A2:B20]   |
| ST-131-S120EC | aac(3)-IIa-like,aac(6')Ib-cr,blaCTX-M-15,blaOXA-1,blaTEM-1C,catB3-like,strA,strB-like,sul2,tet(A)      | gad,iha,iss,sat       | IncFIA                                   | IncB/O/K/Z,Col8282,ColRNAI,Col156,Col(MG828)  | IncF[F -:A1:B-]   |
| ST-131-S111EC | aac(3)-IIa-like,aac(6')Ib-cr,aadA5,blaCTX-M-15,blaOXA-1,catB3-like,dfrA17,mph(A),sul1,tet(A)           | cnf1,gad,iha,iss,sat  | IncFII,IncFIB(AP001918),IncFIA           |                                               | IncF[F31:A20:B1]  |
| ST-131-S119EC | aac(3)-IIa-like,aac(6')Ib-cr,aadA5,blaCTX-M-15,blaOXA-1,catB3-like,dfrA17,mph(A),sul1,tet(A)           | cnf1,gad,iha,iss,sat  | IncFII,IncFIB(AP001918),IncFIA           |                                               | IncF[F36:A20:B1]  |
| ST-131-S118EC | blaTEM-1B-like,strA,strB,sul2                                                                          | gad,iha,iss,sat,senB  | IncFII(29),IncFIB(AP001918),IncFII(pCoo) | ColRNAI,Col(MG828),Col156,IncX1,Col8282,IncQ1 | IncF[F10:A -:B10] |

|               |                                                                                                 |                      |                                         |                                     |                  |
|---------------|-------------------------------------------------------------------------------------------------|----------------------|-----------------------------------------|-------------------------------------|------------------|
| ST-131-S117EC | aac(3)-IId-like,blaTEM-1B                                                                       | gad,iha,iss,sat      | IncFII(pRSB107),IncFIA                  | Col8282,Col156                      | IncF[F1:A2:B-]   |
| ST-131-S116EC | aac(3)-IIa-like,aac(6')Ib-cr,aadA5,blaCTX-M-15,blaOXA-1,blaTEM-1B,catB3-like,dfrA17,sul1        | gad,iha,iss,sat      | IncFII,IncFIB(AP001918),IncFIA          | ColRNAI,Col(MG828)                  | IncF[F31:A20:B1] |
| ST-131-S115EC |                                                                                                 | gad,iha,iss,sat,senB | IncFII(29),IncFIB(AP001918)             | Col156                              | IncF[F29:A:B10]  |
| ST-131-S114EC | aac(3)-IIa-like,aac(6')Ib-cr,aadA5,blaCTX-M-15,blaOXA-1,catB3-like,dfrA17,mph(A),sul1,tet(A)    | gad,iha,iss,sat      | IncFII,IncFIA                           | Col8282,Col156,IncY,Col(MG828)      | IncF[F2:A1:B-]   |
| ST-131-S113EC | aadA5,blaCTX-M-3,blaTEM-1B-like,dfrA17,fosA,mph(A),strA,strB-like,sul1,sul2,tet(A)              | gad,iha,iss,sat,senB | IncFII(pRSB107),IncFIA,IncFIB(AP001918) | IncX1,Col8282,Col156                | IncF[F1:A2:B20]  |
| ST-131-S112EC | aac(3)-IIa-like,aac(6')Ib-cr,aadA2,blaCTX-M-15,blaOXA-1,catB3-like,dfrA12,mph(A),sul1,tet(A)    | gad,iha,iss,sat      | IncFII,IncFIB(AP001918),IncFIA          | Col(BS512),Col8282,Col(MG828)       | IncF[F36:A1:B20] |
| ST-131-S111EC | aac(6')Ib-cr,aadA5,blaCTX-M-3,blaTEM-1B-like,dfrA17,fosA,mph(A),strA,strB-like,sul1,sul2,tet(A) | gad,iha,iss,sat      | IncFII(pRSB107),IncFIA                  | IncX1,Col156                        | IncF[F1:A2:B-]   |
| ST-131-S110EC | aac(6')Ib-cr,aadA5,blaCTX-M-15,blaOXA-1,catB3-like,dfrA17,mph(A),sul1,tet(A)                    | gad,iha,iss,nfaE,sat | IncFIA,IncFII                           | Col(MG828)                          | IncF[F2:A1:B-]   |
| ST-131-S10EC  | aac(6')Ib-cr,aadA5,blaOXA-1,catB3-like,dfrA17,mph(A),sul1                                       | gad,iha,iss,sat      | IncFIA,IncFII                           | IncB/O/K/Z,Col156,ColpVC,Col(MG828) | IncF[F2:A1:B-]   |
| ST-131-S109EC | aadA5,blaCTX-M-27,dfrA17,mph(A),strA,strB-like,sul1,sul2,tet(A)                                 | gad,iha,iss,sat,senB | IncFII(pRSB107),IncFIA,IncFIB(AP001918) | Col156,Col(MG828)                   | IncF[F1:A2:B20]  |
| ST-131-S108EC | aadA5,blaCTX-M-27,dfrA17,mph(A),strA,strB-                                                      | gad,iha,iss,sat,senB | IncFII(pRSB107),IncFIA,IncFIB(AP001918) | Col156,Col(MG828)                   | IncF[F1:A2:B20]  |

|               |                                                                                                                                                 |                                     |                                                        |                                                                              |                                                |
|---------------|-------------------------------------------------------------------------------------------------------------------------------------------------|-------------------------------------|--------------------------------------------------------|------------------------------------------------------------------------------|------------------------------------------------|
|               | like,sul1,sul2,tet(A)                                                                                                                           |                                     |                                                        |                                                                              |                                                |
| ST-131-S107EC |                                                                                                                                                 | NA                                  | IncFIB(K),<br>IncHI1B                                  |                                                                              | IncHI1<br>[Unknown ST],<br>IncF[Unknown<br>ST] |
| ST-131-S105EC |                                                                                                                                                 | gad,iha,iss,sat,<br>senB            | IncFII(29),IncFIB<br>(AP001918)                        | Col156,IncX4                                                                 | IncF[F29:A-<br>:B10]                           |
| ST-131-S104EC |                                                                                                                                                 | gad,iha,iss,sat,<br>senB            | IncFII(29),IncFIB<br>(AP001918)                        | Col156                                                                       | IncF[F29:A-<br>:B10]                           |
| ST-131-S103EC | blaCTX-M-<br>15,mph(A)                                                                                                                          | gad,iha,iss,nfaE,<br>sat            | IncFII(pRSB107),<br>IncFIB(pB171)                      | Col8282,Col156                                                               | IncF[F1:A-:B23]                                |
| ST-131-S102EC | aac(6')Ib-<br>cr,blaCTX-M-<br>3,blaTEM-1B-<br>like,fosA                                                                                         | gad,iha,iss,sat,<br>senB            | IncFII(pRSB107),<br>IncFIA,IncFIB(AP<br>001918)        | IncX1,Col8282,<br>Col156                                                     | IncF[F1:A2:B20]                                |
| ST-131-S101EC | aac(6')Ib-<br>cr,aadA5,blaCTX<br>-M-15,blaOXA-<br>1,catB3-<br>like,dfrA17,mph<br>(A),sul1,tet(A)                                                | gad,iha,iss,nfaE,<br>sat            | IncFII,IncFIA                                          | Col(BS512),<br>Col156                                                        | IncF[F2:A1:B-]                                 |
| ST-131-S100EC | aadA5,blaCTX-<br>M-<br>27,dfrA17,mph(<br>A),strA,strB-<br>like,sul1,sul2,tet<br>(A)                                                             | gad,iha,iss,sat,<br>senB            | IncFII(pRSB107),<br>IncFIA,IncFIB(AP<br>001918)        | Col8282,Col156                                                               | IncF[F1:A2:B20]                                |
| ST-131-P56EC  | aac(6')Ib-<br>cr,aadA5,ARR-<br>3,blaOXA-<br>1,blaTEM-<br>1B,catB3-<br>like,dfrA17,mph<br>(A),strA,strB-<br>like,sul1,sul2,tet<br>(A)            | gad,iha,iss,sat,<br>senB            | IncFII(pRSB107),<br>IncFIA,IncFIB(AP<br>001918)        | Col156,<br>Col(MG828)                                                        | IncF[F1:A2:B20]                                |
| ST-131-P53EC  | aac(6')Ib-<br>cr,aadA5,blaCTX<br>-M-15,blaOXA-<br>1,blaTEM-1A-<br>like,catB3-<br>like,dfrA17,mph<br>(A),strA,strB-<br>like,sul1,sul2,tet<br>(A) | gad,iha,iss,sat,<br>senB            | IncFII(pRSB107),<br>IncFIA,IncFIB(AP<br>001918)        | Col(MG828),<br>Col156,IncX4,<br>ColRNAI                                      | IncF[F4:A2:B20]                                |
| ST-131-P50EC  | blaTEM-1B                                                                                                                                       | celb,gad,iss,sat                    | IncFII(pRSB107),<br>IncFIA,IncFIB(AP<br>001918)        | Col(MG828),<br>Col(pWES),ColR<br>NAI,Col156,<br>IncX1,Col8282,<br>IncB/O/K/Z | IncF[F1:A2:B20]                                |
| ST-131-P189EC | aac(3)-IId-<br>like,aadA5,blaT<br>EM-<br>1B,dfrA17,sul1                                                                                         | gad,iha,iss,sat,<br>senB            | IncFIA,IncFIB(AP<br>001918)                            | Col156,<br>Col(MG828)                                                        | IncF[F-:A2:B20]                                |
| ST-131-P146EC | aac(3)-IId-<br>like,aadA5,blaT<br>EM-1B-<br>like,dfrA17,strA,<br>strB-like,sul2                                                                 | gad,iha,iss,sat,<br>senB            | IncFII(pRSB107),<br>IncFIA,IncFIB(AP<br>001918),IncFII | Col(BS512),<br>Col(MG828),<br>IncB/O/K/Z,<br>ColRNAI                         | IncF<br>[F1:A2:B20*]                           |
| ST-131-P112EC |                                                                                                                                                 | astA,gad,ireA,ir<br>oN,iss,mchF,vat | IncFII,IncFIB(AP<br>001918)                            | ColRNAI                                                                      | IncF[F24:A-<br>:B1*]                           |



|                |                                                                                        |                             |                                                               |                                               |                                    |
|----------------|----------------------------------------------------------------------------------------|-----------------------------|---------------------------------------------------------------|-----------------------------------------------|------------------------------------|
| ST-131-MS2493  | aadA5,blaTEM-1B,dfrA17,mph(A),strA,strB-like,sul1,sul2,tet(A)                          | gad,iha,iss,sat,senB        | IncFII(pRSB107),IncFIA,IncFIB(AP001918)                       | Col156                                        | IncF[F1:A2:B20]                    |
| ST-131-MS2481  | aadA5,blaTEM-1B,dfrA17,mph(A),sul1,tet(A)                                              | gad,iha,ireA,iss,sat        | IncFIA,IncFIB(AP001918),IncFII                                | Col8282,Col(MG828)                            | IncF[F22:A1:B20]                   |
| ST-131-HVR83   | aadA5,blaTEM-1B-like,dfrA17-like,mph(A),strA,strB-like,sul1,sul2,tet(A)                | gad,iha,iss,sat,senB        | IncFIA,IncI1,IncFIB(AP001918)                                 | ColRNAI,Col(MG828),Col156,IncX1,IncX4,Col8282 | IncI1[Unknown ST],IncF[F -:A2:B20] |
| ST-131-HVR2496 | blaTEM-1B                                                                              | gad,iha,iss,sat,senB        | IncFII(pRSB107),IncFIA,IncFIB(AP001918)                       | Col8282,Col156,ColpVC                         | IncF[F1:A2:B20]                    |
| ST-131-HVM834  | aac(6')Ib-cr,aadA5,blaCTX-M-15,blaOXA-1,blaTEM-1A,catB3-like,dfrA17,mph(A),sul1,tet(A) | gad,iha,iss,nfaE,sat        | IncFII(pRSB107),IncFII,IncI1,IncFIA                           | ColRNAI,Col(MG828),Col156,IncX1,IncX4,Col8282 | IncI1[Unknown ST],IncF[F2:A1:B-]   |
| ST-131-HVM826  | blaTEM-1A                                                                              | gad,iha,sat                 | IncFII(pRSB107),IncFIA,IncFIB(AP001918),IncFII(pCoo)          | Col156                                        | IncF[F1:A2:B20]                    |
| ST-131-HVM52   | blaTEM-1C,tet(A)-like                                                                  | cnf1,gad,iroN,iss,mchF      | IncFII(pRSB107),IncFII,IncI1,IncFIB(AP001918)                 | IncB/O/K/Z,ColRNAI                            | IncF[F2:A -:B1],IncI1[Unknown ST]  |
| ST-131-HVM5    |                                                                                        | gad,iha,iss,sat,senB        |                                                               | Col8282,ColRNAI,Col156,Col(MG828)             | NA                                 |
| ST-131-HVM3189 | aac(3)-IId-like,aadA5,blaTEM-1B,mph(A),strA,strB-like,sul1,sul2,tet(A)                 | gad,iha,iss,sat,senB        | IncFII(pRSB107),IncFIA,IncFIB(AP001918)                       | Col8282,Col156,Col(MG828)                     | IncF[F1:A2:B20]                    |
| ST-131-HVM3017 | aac(6')Ib-cr,blaCTX-M-15,blaOXA-1,catB3-like,tet(A)                                    | cnf1,gad,iha,iss,sat        | IncFII,IncFIB(AP001918),IncFIA                                |                                               | IncF[F36:A20:B1]                   |
| ST-131-HVM277  | blaTEM-1C,tet(A)                                                                       | astA,cnf1,gad,iroN,iss,mchF | IncFII,IncFIB(AP001918)                                       | ColRNAI,Col(MG828)                            | IncF[F2:A -:B1]                    |
| ST-131-HVM2757 | aadA1,aadA2,blaTEM-1B,cmlA1-like,dfrA12,sul3,tet(B)                                    | gad,ireA,iroN,iss,mchF,vat  | IncFIA(HI1),IncHI1B(R27),IncFIC(FII),IncFIB(AP001918),IncHI1A | p0111,ColRNAI,ColpVC,Col(MG828)               | IncHI1[Unknown ST],IncF[F18:A8:B1] |
| ST-131-HVM2289 | aadA1,aadA2,blaTEM-1C,cmlA1-like,dfrA12,sul3,tet(A)                                    | ccl,cnf1,gad,iroN,iss,mchF  | IncFII,IncI1,IncFIB(AP001918)                                 | ColRNAI                                       | IncI1[ST-48],IncF[F2:A -:B1]       |
| ST-131-HVM2049 |                                                                                        | gad,ireA,iroN,iss,mchF,vat  | IncFII,IncFIB(AP001918)                                       | Col156,ColRNAI                                | IncF[F24:A -:B1*]                  |
| ST-131-HVM2044 | aadA1,aadA2,blaTEM-                                                                    | ccl,cnf1,gad,iroN,iss,mchF  | IncFII,IncI1,IncFIB(AP001918)                                 | ColRNAI                                       | IncF[F2:A -:B1],IncI1[ST-          |

|                               |                                                                                    |                                               |                                      |                                         |                              |
|-------------------------------|------------------------------------------------------------------------------------|-----------------------------------------------|--------------------------------------|-----------------------------------------|------------------------------|
|                               | 1C,cmlA1-like,dfrA12,sul3,tet(A)                                                   |                                               |                                      |                                         | 48]                          |
| ST-131-HVM1997                | aac(6')lb-cr,aadA5,blaCTX-M-15,blaOXA-1,catB3-like,dfrA17,mph(A),sul1,tet(A)       | gad,iha,iss,nfaE,sat                          | IncFII,IncFIA                        | Col8282,Col156,ColRNAI                  | IncF[F2:A1:B-]               |
| ST-131-HVM1619                | aac(6')lb-cr,aadA5,blaCTX-M-15,blaOXA-1,catB3-like,dfrA17,mph(A),sul1,tet(A)       | gad,iha,iss,nfaE                              | IncFII,IncFIA                        | Col8282,ColRNAI,Col156,IncX4,Col(MG828) | IncF[F2:A1:B-]               |
| ST-131-HVM1299                | aac(6')lb-cr,blaCTX-M-15,blaOXA-1,catB3-like,tet(A)                                | cnf1,gad,iha,iss,sat                          | IncFIA,IncFIB(AP001918),IncFII       |                                         | IncF[F36:A20:B1]             |
| ST-131-HVM1181                |                                                                                    | gad,ireA,iroN,iss,mchF,vat                    | IncFII,IncFIB(AP001918)              | ColRNAI                                 | IncF[F24:A-B1*]              |
| ST-131-HVM1147                |                                                                                    | gad,iha,iss,nfaE,sat,senB                     | IncFII(29),IncFIB(AP001918)          | Col156                                  | IncF[F29:A-B10]              |
| ST-131-B36EC                  | aac(6')lb-cr,aadA5,blaCTX-M-15,blaOXA-1,catB3-like,dfrA17,mph(A),sul1,tet(A)       | gad,iha,iss,nfaE,sat                          | IncFII,IncFIA                        | Col(MG828)                              | IncF[F2:A1:B-]               |
| S_sonnei_Ss046                | aadA1,dfrA1,stra,straB,sul2,tet(A)-like                                            | capU,gad,ipaD,ipaH9.8,lpfA,senB,sigA,virF     | IncFII                               | Col(BS512),Col156,ColRNAI               | IncF[F27:A-B-]               |
| S_flexneri_2a_str_301         |                                                                                    | capU,gad,ipaD,ipaH9.8,lpfA,pic,sepA,sigA,virF | IncFII                               |                                         | IncF[F27:A-B-]               |
| S_dysenteriae_Sd197           |                                                                                    | capU,gad,ipaD,ipaH9.8,iroN,stx1A,stx1B        | IncFII                               | ColE10                                  | IncF[F25:A-B-]               |
| S_boydii_Sb227                |                                                                                    | capU,gad,iha,ipaH9.8,senB,sigA,virF           | IncFII                               |                                         | IncF[F27:A-B-]               |
| E_coli_UTI89                  |                                                                                    | cnf1,gad,iroN,iss,senB,sfaS,vat               | IncFII(29),IncFIB(AP001918)          | Col156                                  | IncF[F29:A-B10]              |
| E_coli_UMN026                 | aadA5,blaTEM-1B,catA1-like,dfrA17,mph(A),sul1,tet(B)                               | air,eilA,gad,iha,iss,lpfA,sat,senB            | IncFII(29),IncFIB(AP001918)          | IncX1,Col156                            | IncF[F29:A-B10]              |
| E_coli_str_K-12_substr_MG1655 |                                                                                    | gad,iss                                       |                                      |                                         | NA                           |
| E_coli_SMS-3-5                | aadA2,aph(3')-la,blaTEM-1B,catA2-like,dfrA14-like,stra-like,straB-like,sul2,tet(A) | air,astA,cma,eilA,gad,iha,lpfA                | IncFII,IncFIB(AP001918)              | Col8282,ColRNAI                         | IncF[F24:A-B1]               |
| E_coli_SE11                   | tet(C)-like                                                                        | gad,iss,lpfA                                  | IncFII(pSE11),IncI1,IncFIB(AP001918) | Col8282,ColRNAI                         | IncI1[ST-14],IncF[F20:A-B12] |
| E_coli_S88                    |                                                                                    | gad,ireA,iroN,iss                             | IncFII,IncFIB(AP                     |                                         | IncF[F24:A-B1]               |

|                               |                                                                         |                                                                                                                    |                                        |                           |                                  |
|-------------------------------|-------------------------------------------------------------------------|--------------------------------------------------------------------------------------------------------------------|----------------------------------------|---------------------------|----------------------------------|
|                               |                                                                         | ,mchF,vat                                                                                                          | 001918)                                |                           |                                  |
| E_coli_O83-H1_str_NRG_857C    | aadA1,blaTEM-1B-like,catA1-like,dfrA1,mph(B),strA,strB,sul1,sul2,tet(A) | cma,gad,iroN,iss,vat                                                                                               | IncFIC(FII),IncFIB(AP001918)           | IncQ1                     | IncF[F18:A-:B1]                  |
| E_coli_O7-K1_str_CE10         |                                                                         | air,capU,eilA,gad,iha,iss,lpfA,sat,senB                                                                            | IncFII(29),IncFIB(AP001918)            | Col(MG828),Col156,ColRNAI | IncF[F29:A-:B10]                 |
| E_coli_O55-H7_str_RM12579     | blaTEM-1B,strA,strB,sul2                                                | astA,ea,e,efa1,espA,espB,espF,espJ,etpD,gad,iss,nleA,nleB,nleC,tccP,tir                                            | IncFIB(AP001918)                       | p0111,ColRNAI             | IncF[F-:A-:B15]                  |
| E_coli_O157-H7_str_EDL933     |                                                                         | astA,ea,e,ehxA,espA,espB,espF,espJ,espP,etpD,gad,iha,iss,katP,nleA,nleB,nleC,ctx1A,ctx1B,ctx2A,ctx2B,tccP,tir,toxB | IncFII,IncFIB(AP001918)                |                           | IncF[F23:A-:B3]                  |
| E_coli_O127-H6_str_E2348-69   | strA,strB,sul2                                                          | astA,bfpA,cif,ea,e,efa1,espA,espC,espF,espJ,gad,nleA,nleB,nleC,perA,tir                                            | IncFIB(pB171),IncFII(pCoo)             | ColRNAI                   | IncF[F13:A-:B23]                 |
| E_coli_O104-H4_str_2011C-3493 | blaCTX-M-15,blaTEM-1B,dfrA7,strA,strB,sul1-like,sul2,tet(A)             | aaiC,aap,aar,aatA,aggA,aggB,aggC,aggD,aggR,capU,gad,iha,lpfA,mchB,mchC,mchF,ORF3,ORF4,pic,sepA,sigA,ctx2A,ctx2B    | IncFII(pRSB107),IncI1,IncFIB(AP001918) | IncQ1,Col(MG828)          | IncI1[ST-31],IncF[F48:A-:B25]    |
| E_coli_Nissle_1917            |                                                                         | gad,iha,iroN,iss,mchB,mchC,mchF,mcmA,pic,sat,vat                                                                   |                                        | Col(MGD2),ColRNAI         | NA                               |
| E_coli_M4163                  |                                                                         | capU,gad,ipaD,senB,virF                                                                                            | IncFII                                 | Col(MG828)                | IncF[F28:A-:B-]                  |
| E_coli_LF82                   |                                                                         | gad,iss,vat                                                                                                        |                                        |                           | NA                               |
| E_coli_IAI39                  |                                                                         | air,capU,eilA,gad,lpfA                                                                                             |                                        |                           | NA                               |
| E_coli_HS                     |                                                                         | gad                                                                                                                |                                        |                           | NA                               |
| E_coli_ETEC_H10407            |                                                                         | astA,cfaC,eatA,gad,ltcA,sta1                                                                                       | IncFII(29),IncFII                      | Col(MGD2)                 | IncF[F12:A-:B-]                  |
| E_coli_E24377A                | strA,strB,sul2                                                          | astA,capU,eatA,gad,lpfA,ltcA                                                                                       | IncI1,IncFII(pHN7A8),IncFII(pCoo)      | ColRNAI                   | IncI1[UnknownST],IncF[F11:A-:B-] |
| E_coli_CFT073                 |                                                                         | gad,iha,ireA,iroN,iss,mchB,mchC,mchF,mcmA,pic,sat,vat                                                              |                                        |                           | NA                               |
| E_coli_55989                  | tet(B)                                                                  | aaiC,capU,gad,iha,lpfA,pic,sigA                                                                                    |                                        |                           | NA                               |
| E_coli_4608-58                |                                                                         | capU,gad,iha,ipaD,senB,sigA,virF                                                                                   | IncFII                                 |                           | IncF[F28:A-:B-]                  |
| E_coli_042                    | aadA1,catA1-like,sul1,tet(A)                                            | aafA,aafB,aafC,aafD,aaiC,aap,aar,aatA,aggR,air,a                                                                   | IncFIC(FII)                            |                           | IncF[F9:A-:B-]                   |

|  |  |                                                              |  |  |  |
|--|--|--------------------------------------------------------------|--|--|--|
|  |  | stA,capU,eilA,gad,lpfA,mchB,mchC,mchF,mcmA,ORF3,ORF4,pet,pic |  |  |  |
|--|--|--------------------------------------------------------------|--|--|--|
